# Supplementary material
Source: PubMed Central journal article supplement (PMC5292256)
Supplement: NIHMS845638-supplement-supplement_1.pdf [file NIHMS845638-supplement-supplement_1.pdf]

**Supplementary Table I (online only).** Rates of clinical or electrocardiographic (ECG) myocardial infarction (MI) by cardiac risk and antiplatelet (AP) and statin use

| <i>Cardiac risk</i> | <i>Preoperative medication status</i> |              |                  |                | <i>P</i> |
|---------------------|---------------------------------------|--------------|------------------|----------------|----------|
|                     | <i>None, %</i>                        | <i>AP, %</i> | <i>Statin, %</i> | <i>Both, %</i> |          |
| Overall             | 1.0                                   | 1.4          | 1.3              | 1.8            | .07      |
| Low                 | 0.8                                   | 0.8          | 0.0              | 1.1            | .71      |
| Medium              | 1.3                                   | 1.9          | 1.6              | 2.1            | .77      |
| High                | 0.5                                   | 3.0          | 2.9              | 3.3            | .16      |

**Supplementary Table II (online only).** Myocardial infarction (MI) rates by medication status, procedure, and cardiac risk

| <i>Operation</i>     | <i>Cardiac risk</i> | <i>None, %</i> | <i>AP, %</i> | <i>Statin, %</i> | <i>Both, %</i> | <i>P</i> |
|----------------------|---------------------|----------------|--------------|------------------|----------------|----------|
| OAR                  | Low                 | 2              | 4            | 2                | 4              | .51      |
|                      | Medium              | 4              | 3            | 4                | 5              | .72      |
|                      | High                | 5              | 8            | 8                | 12             | .46      |
| Suprainguinal bypass | Low                 | 1              | 1            | 2                | 2              | .24      |
|                      | Medium              | 5              | 3            | 1                | 7              | .13      |
|                      | High                | 4              | 11           | 7                | 6              | .48      |
| Infrainguinal bypass | Low                 | 1              | 1            | 2                | 1              | .79      |
|                      | Medium              | 3              | 2            | 3                | 4              | .35      |
|                      | High                | 5              | 4            | 4                | 6              | .64      |

AP, Antiplatelet; OAR, open abdominal aortic aneurysm repair.

**Supplementary Table III (online only).** Multivariable model for postoperative myocardial infarction (MI) or death

| Variable                              | OR  | 95% CI    | Overall P <sup>a</sup> | P <sup>b</sup> |
|---------------------------------------|-----|-----------|------------------------|----------------|
| Cardiac risk                          |     |           | .06                    |                |
| Low                                   | 1.0 | Reference |                        |                |
| Intermediate                          | 1.4 | 1.0-1.8   |                        | .04            |
| High                                  | 1.8 | 1.2-2.7   |                        | <.01           |
| Medication status                     |     |           | .95                    |                |
| Both AP and statin                    | 1.0 | Reference |                        |                |
| AP only                               | 1.0 | 0.8-1.2   |                        | .75            |
| Statin only                           | 1.0 | 0.8-1.3   |                        | .93            |
| Neither agent                         | 1.1 | 0.8-1.5   |                        | .67            |
| Age quartiles                         |     |           | <.01                   |                |
| <60                                   | 1.0 | Reference |                        |                |
| 60-67                                 | 1.6 | 1.2-2.3   |                        | <.01           |
| 68-74                                 | 1.9 | 1.3-2.7   |                        | <.01           |
| >75                                   | 2.2 | 1.5-3.1   |                        | <.01           |
| Male                                  | 0.9 | 0.8-1.1   |                        | .51            |
| Hispanic                              | 0.5 | 0.3-0.9   |                        | .03            |
| Race                                  |     |           | <.01                   |                |
| White                                 | 1.0 | Reference |                        |                |
| American Indian                       | 2.0 | 0.6-7.1   |                        | .28            |
| Asian                                 | 2.8 | 1.3-6.1   |                        | .01            |
| Black                                 | 0.6 | 0.4-0.8   |                        | <.01           |
| Other <sup>c</sup>                    | 1.1 | 0.6-1.9   |                        | .78            |
| Smoking                               |     |           | .1                     |                |
| Never                                 | 1.0 | Reference |                        |                |
| Current                               | 0.9 | 0.7-1.2   |                        | .45            |
| Prior (>12 months ago)                | 1.1 | 0.8-1.5   |                        | .43            |
| Hypertension                          | 1.3 | 0.9-1.8   |                        | .16            |
| Diabetes mellitus                     |     |           | <.01                   |                |
| None                                  | 1.0 | Reference |                        |                |
| Diet                                  | 1.5 | 1.1-2.2   |                        | .03            |
| Oral medication                       | 1.4 | 1.1-1.7   |                        | .02            |
| Insulin                               | 1.5 | 1.1-1.9   |                        | <.01           |
| Coronary artery disease               |     |           | <.01                   |                |
| None                                  | 1.0 | Reference |                        |                |
| History of MI                         | 1.2 | 0.9-1.5   |                        | .28            |
| Stable angina                         | 1.6 | 1.2-2.3   |                        | <.01           |
| Unstable angina or MI                 | 1.7 | 1.1-2.8   |                        | .04            |
| CABG or PCI within 5 years            | 1.1 | 0.9-1.4   |                        | .34            |
| Congestive heart failure              | 1.4 | 1.1-1.8   |                        | <.01           |
| Chronic obstructive pulmonary disease |     |           | .98                    |                |
| None                                  | 1.0 | Reference |                        |                |
| History, but not treated              | 1.0 | 0.8-1.4   |                        | .77            |
| On medication                         | 1.0 | 0.8-1.3   |                        | .99            |
| On oxygen                             | 1.0 | 0.6-1.6   |                        | .84            |
| On dialysis                           | 0.6 | 0.2-2.0   |                        | .37            |
| All stress                            |     |           | <.01                   |                |
| Normal                                | 1.0 | Reference |                        |                |
| (+) Ischemia                          | 1.5 | 1.1-2.0   |                        | <.01           |
| (+) MI                                | 1.2 | 0.8-1.7   |                        | .48            |
| (+) Both                              | 1.2 | 0.6-2.1   |                        | .64            |
| Not done                              | 0.8 | 0.7-0.9   |                        | .04            |
| Procedure                             |     |           | <.01                   |                |
| Infringuinal bypass                   | 1.0 | Reference |                        |                |
| Suprainguinal bypass                  | 1.7 | 1.3-2.1   |                        | <.01           |
| OAR                                   | 1.6 | 1.1-1.9   |                        | .02            |
| Blood transfusion                     |     |           | <.01                   |                |
| None                                  | 1.0 | Reference |                        |                |
| 1 or 2                                | 2.4 | 1.8-3.0   |                        | <.01           |
| ≥3                                    | 5.3 | 4.2-6.7   |                        | <.01           |
| Unknown/missing                       | 4.7 | 3.2-6.9   |                        | <.01           |

**Supplementary Table III (online only).** Continued.

| Variable                                                  | OR  | 95% CI    | Overall P <sup>a</sup> | P <sup>b</sup> |
|-----------------------------------------------------------|-----|-----------|------------------------|----------------|
| EBL                                                       |     |           | <.01                   |                |
| <150 mL                                                   | 1.0 | Reference |                        |                |
| 150-350 mL                                                | 0.9 | 0.6-1.2   |                        | .35            |
| 351-1000 mL                                               | 1.1 | 0.9-1.4   |                        | .44            |
| >1000 mL                                                  | 1.7 | 1.2-2.3   |                        | <.01           |
| Unknown/missing                                           | 1.2 | 0.8-1.8   |                        | .34            |
| Transfer from home or rehabilitation facility vs hospital | 1.1 | 0.7-1.6   |                        | .77            |
| Preoperative living at home (vs nursing home)             | 1.3 | 0.8-2.1   |                        | .30            |
| Prior bypass                                              | 1.0 | 0.8-1.2   |                        | .72            |
| Prior CEA or CAS                                          | 1.0 | 0.8-1.4   |                        | .76            |
| Prior PTA/stent                                           | 0.9 | 0.7-1.1   |                        | .33            |
| Prior major amputation                                    | 1.3 | 0.8-2.1   |                        | .29            |
| Beta blocker use                                          |     |           | .42                    |                |
| None                                                      | 1.0 | Reference |                        |                |
| Preoperative within 30 days only                          | 1.3 | 0.9-1.9   |                        | .10            |
| Chronic use (>30 days)                                    | 1.1 | 0.9-1.4   |                        | .36            |
| Intolerant                                                | 0.9 | 0.3-2.2   |                        | .78            |
| Operative day only                                        | 1.5 | 0.8-2.9   |                        | .24            |

AP, Antiplatelet; CABG, coronary artery bypass; CAS, carotid artery stent; CEA, carotid endarterectomy; CI, confidence interval; EBL, estimated blood loss; OAR, open abdominal aortic aneurysm repair; OR, odds ratio; PCI, percutaneous coronary intervention; PTA, percutaneous transluminal angioplasty.

<sup>a</sup>Overall P value for given categorical variable.

<sup>b</sup>P value for indicator variable within each group compared with reference.

<sup>c</sup>Native Hawaiian/Pacific Islander or >1 race.
